# Supplementary material for: Geographic recommender systems in e-commerce based on population
Source: PeerJ Comput Sci. 2025 Jan 16;11:e2525. doi: 10.7717/peerj-cs.2525 (PMC11784866; doi:10.7717/peerj-cs.2525)
Supplement: Supplemental Information 2 [file peerj-cs-11-2525-s002.xls]

## Sheet: Sheet1
id	name	code	value
1	Web cam	2	94
2	VR headset	1	99
3	X3D.Printing	1	103
4	Monitors	3	98
5	Gaming.Laptops	4	91
6	Keyboards.Mice	3	95
7	Headsets	3	100
8	Desktop.Computers	2	80
9	Printers	2	83
10	Scanners	3	96
11	Printer.Ink	1	95
12	KVM.Switches	0	97
13	Projectors	0	87
14	External Hard Drives	2	94
15	USB Flash Drives	1	99
16	Memory Cards (SD, microSD)	1	103
17	Laptop Cooling Pads	3	98
18	Docking Stations	4	91
19	USB Hubs	3	95
20	Cable Management Accessories	3	100
21	Power Banks	2	80
22	Laptop Bags & Sleeves	2	83
23	Webcam Covers	3	96
24	Wi-Fi Routers	1	95
25	Network Extenders	0	97
26	Ethernet Cables	0	87
27	Modems	2	94
28	Network Switches	1	99
29	Bluetooth Adapters	1	103
30	Gaming Chairs	3	98
31	Gaming Desks	4	91
32	Mouse Pads (including gaming ones)	3	95
33	Gaming Controllers	3	100
34	Streaming Gear (e.g., Stream Decks)	2	80
35	Surge Protectors	2	83
36	Cable Organizers	3	96
37	Ergonomic Mouse and Keyboards	1	95
38	Smart Speakers	0	97
39	Smart Plugs	0	87
40	Smart Light Bulbs	2	94
41	Smart Home Hubs	1	99
42	Smart Cameras	1	103
43	Smart Thermostats	3	98
44	Bluetooth Speakers	4	91
45	Soundbars	3	95
46	Home Theater Systems	3	100
47	Wireless Earbuds	2	80
48	Over-Ear Headphones	2	83
49	Microphones	3	96
50	Noise-Cancelling Headphones	1	95
51	Antivirus Software	0	97
52	Office Software (e.g., Microsoft Office)	0	87
53	Graphic Design Software	2	94
54	Accounting Software	1	99
55	Backup Software	1	103
56	3D Printer Filaments	3	98
57	Paper Shredders	4	91
58	Laminators	3	95
59	Binding Machines	3	100
60	Photo Paper	2	80
61	VR Accessories (controllers, base stations)	2	83
62	Action Cameras	3	96
63	Drone Cameras	1	95
64	Battery Chargers	0	97
65	Digital Drawing Tablets	0	87
66	Monitor Stands	2	94
67	Projector Screens	1	99
68	Replacement Laptop Batteries	1	103
69	Laptop Stands	3	98
70	Gadget Cleaning Kits	4	91
71	Digital Cameras	2	94
72	Smart Watches	1	99
73	Fitness Trackers	1	103
74	Bluetooth Headphones	3	98
75	Portable Speakers	4	91
76	External SSDs	3	95
77	Gaming Consoles	3	100
78	Video Games	2	80
79	Wireless Chargers	2	83
80	Car Chargers	3	96
81	Dash Cams	1	95
82	Radar Detectors	0	97
83	GPS Navigation Devices	0	87
84	Cell Phone Cases	2	94
85	Screen Protectors	1	99
86	Power Strips	1	103
87	Smart Watches Accessories	3	98
88	Cordless Phones	4	91
89	Home Security Cameras	3	95
90	Smart Doorbells	3	100
91	Smart Locks	2	80
92	Video Doorbells	2	83
93	Smart Blinds	3	96
94	Robot Vacuums	1	95
95	High-Performance SSDs	0	97
96	Mobile Hotspots	0	87
97	Gaming Headsets	2	94
98	Game Capture Cards	1	99
99	External GPUs	1	103
100	Internal SSDs	3	98
101	External Monitors	4	91
102	All-in-One Printers	3	95
103	Wireless Printers	3	100
104	Portable Printers	2	80
105	Label Makers	2	83
106	Barcode Scanners	3	96
107	Point-of-Sale Systems	1	95
108	Cash Registers	0	97
109	Receipt Printers	0	87
110	Barcode Printers	2	94
111	Industrial Printers	1	99
112	Digital Scales	1	103
113	Cash Counters	3	98
114	Paper Cutters	4	91
115	Desk Lamps	3	95
116	Desk Organizers	3	100
117	Standing Desks	2	80
118	Office Chairs	2	83
119	Filing Cabinets	3	96
120	Bookcases	1	95
121	Smart TVs	0	97
122	Air Purifiers	0	87
123	Robotic Lawn Mowers	2	94
124	Electric Toothbrushes	1	99
125	Espresso Machines	1	103
126	Juicers	3	98
127	Air Fryers	4	91
128	Bread Makers	3	95
129	Electric Kettles	3	100
130	Rice Cookers	2	80
131	Food Processors	2	83
132	Vacuum Cleaners	3	96
133	Steam Irons	1	95
134	Hair Dryers	0	97
135	Electric Shavers	0	87
136	Massage Chairs	2	94
137	Yoga Mats	1	99
138	Dumbbells	1	103
139	Resistance Bands	3	98
140	Treadmills	4	91
141	Exercise Bikes	2	94
142	Camping Tents	1	99
143	Sleeping Bags	1	103
144	Backpacks	3	98
145	Binoculars	4	91
146	Telescope	3	95
147	Golf Clubs	3	100
148	Tennis Rackets	2	80
149	Snowboards	2	83
150	Ski Goggles	3	96
151	Camping Stoves	1	95
152	Portable Generators	0	97
153	Solar Panels	0	87
154	Action Figures	2	94
155	Board Games	1	99
156	Jigsaw Puzzles	1	103
157	LEGO Sets	3	98
158	Dollhouses	4	91
159	Toy Cars	3	95
160	Play Dough	3	100
161	Educational Books	2	80
162	Art Supplies	2	83
163	Musical Instruments	3	96
164	Indoor Plants	1	95
165	Gardening Tools	0	97
166	BBQ Grills	0	87
167	Patio Furniture	2	94
168	Hammocks	1	99
169	Picnic Baskets	1	103
170	Swimming Pools	3	98
171	Pool Floats	4	91
172	Beach Umbrellas	3	95
173	Sunglasses	3	100
174	Watches	2	80
175	Handbags	2	83
176	Wallets	3	96
177	Scarves	1	95
178	Belts	0	97
179	Drone Quadcopters	2	91
180	Action Cameras	1	95
181	Virtual Reality Headsets	1	100
182	Gaming Keyboards	3	80
183	Gaming Mice	4	83
184	Gaming Chairs	3	96
185	Gaming Desks	3	95
186	Gaming Controllers	2	97
187	Gaming Headsets	2	87
188	Streaming Devices (e.g., Roku, Fire TV)	3	94
189	Soundbars	1	99
190	Home Theater Systems	0	103
191	Blu-ray Players	0	98
192	Projectors	2	91
193	Portable DVD Players	1	95
194	Digital Cameras	1	100
195	DSLR Cameras	3	80
196	Mirrorless Cameras	4	83
197	Camera Lenses	3	96
198	Camera Tripods	3	95
199	Camera Bags	2	97
200	Instant Cameras	2	87
201	Photo Printers	3	94
202	Binoculars	1	99
203	Telescopes	0	103
204	Microscopes	0	98
205	Night Vision Goggles	2	91
206	Thermal Imaging Cameras	1	95
207	Walkie Talkies	1	100
208	GPS Units	3	80
209	Fitness Trackers	4	83
210	Smart Watches	3	96
211	Heart Rate Monitors	3	95
212	Blood Pressure Monitors	2	97
213	TENS Units	2	87
214	Massage Guns	3	94
215	Electric Toothbrushes	1	99
216	Water Flossers	0	103
217	Hair Clippers	0	98
218	Hair Straighteners	2	91
219	Curling Irons	1	95
220	Electric Shavers	1	100
221	Beard Trimmers	3	80
222	Nail Care Kits	4	83
223	Makeup Mirrors	3	96
224	Skincare Devices (e.g., facial steamers)	3	95
225	Foot Massagers	2	97
226	Handheld Massagers	2	87
227	Massage Chairs	3	94
