# Supplementary material for: Geographic recommender systems in e-commerce based on population
Source: PeerJ Comput Sci. 2025 Jan 16;11:e2525. doi: 10.7717/peerj-cs.2525 (PMC11784866; doi:10.7717/peerj-cs.2525)
Supplement: Supplemental Information 3 [file peerj-cs-11-2525-s003.xls]

## Sheet: Sheet1
id	name	code	x	y	pop
5	Store5	4	10.1558	36.6617	715490
4	Store4	3	10.0464	36.846	667354
3	Store3	2	10.1866	36.7598	1075015
2	Store2	1	10.1923	36.8495	667354
1	Store1	0	10.3188	36.7368	715490
